# Supplementary material for: Revisiting the reaction of hydroxyl radicals with vicinal diols in water
Source: Royal Society of Chemistry journal article supplement (doi:10.1039/c1ob06538f), 2011-10-27
Supplement: c1ob06538f.pdf [file c1ob06538f.pdf]

## SUPPORTING INFORMATION

### **Revisiting the reaction of hydroxyl radicals with 1,2-diols in water**

**Dong Jiang,<sup>a</sup> Sebastián Barata-Vallejo,<sup>b</sup> Bernard T. Golding,<sup>a\*</sup> Carla Ferreri<sup>b</sup> and  
Chryssostomos Chatgililoglu<sup>b\*</sup>**

<sup>a</sup> *School of Chemistry, Newcastle University, Newcastle upon Tyne NE1 7RU, UK. E-mail:  
b.t.golding@newcastle.ac.uk; Fax + 44 (0)191 222 6929; Tel: + 44 (0)191 222 6647*

<sup>b</sup> *ISOF, Consiglio Nazionale delle Ricerche, Via P. Gobetti 101, I-40129 Bologna, Italy. E-mail:  
chrys@isof.cnr.it; Fax: +39 051 639 8349; Tel: +39 051 639 8309*

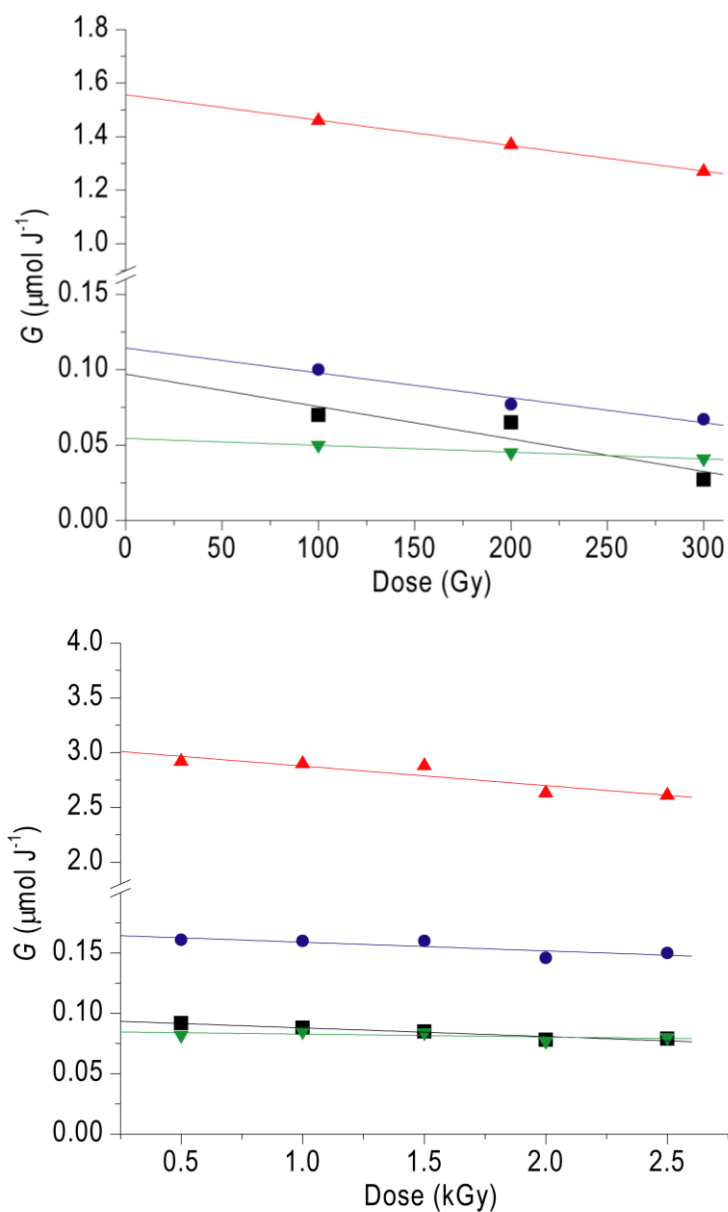

**Figure S1** Radiation chemical yields ( $G$ ) of HCHO ( $\blacktriangledown$ ),  $\text{CH}_3\text{CHO}$  ( $\bullet$ ), acetone ( $\blacktriangle$ ) and  $\text{CH}_3\text{CH}_2\text{CHO}$  ( $\blacksquare$ ) vs dose from the experiments of 0.2 M (upper) and 2.0 M (lower) propane-1,2-diol (cf. Figure 3). The  $G$  values extrapolated to zero dose are reported in Table 2.

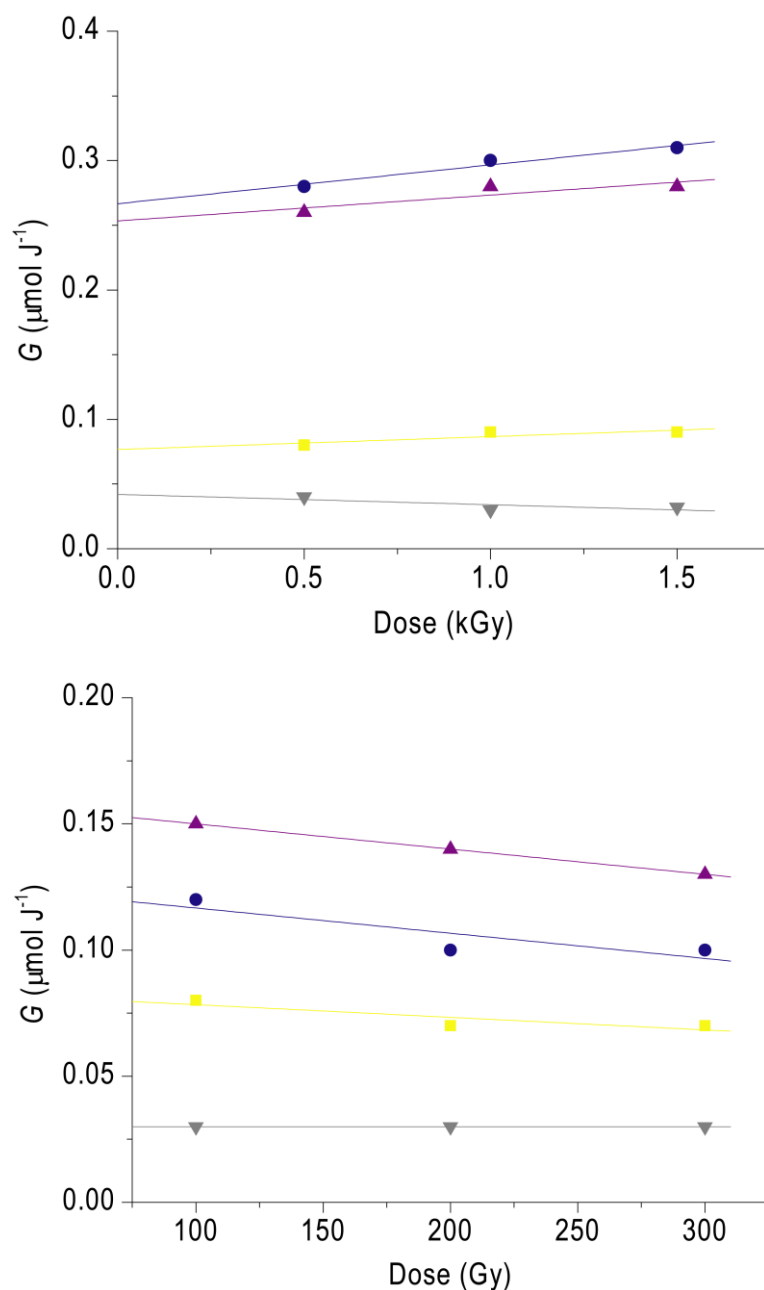

**Figure S2** Radiation chemical yields ( $G$ ) of 3-hydroxybutan-2-one (■),  $\text{CH}_3\text{CHO}$  (●), butan-2-one (▲) and unknown carbonyl product (▼) vs dose from the experiments of 0.2 M (upper) and 2.0 M (lower) butane-2,3-diol (cf. Figure 4). The  $G$  values extrapolated to zero dose are reported in Table 3.
